# Supplementary material
Source: Royal Society of Chemistry journal article supplement (doi:10.1039/d6gc00598e)
Supplement: d6gc00598e1.pdf [file d6gc00598e1.pdf]

## Supporting Information for

### Recycling of spent $\text{LiFePO}_4$ batteries with acid-free process to high-rate $\text{Na}_2\text{FeP}_2\text{O}_7@C$ cathodes for sodium-ion storage

Xianghao Meng<sup>a, b</sup>, Weiya Tian<sup>a, c</sup>, Xiaoling Wang<sup>a, b</sup>, Jiaju Lu<sup>a, b</sup>, Junxian Hu<sup>a, b, \*</sup>,  
Qing Zhao<sup>a, c</sup>, Bo Jin<sup>a, c</sup>, Yaochun Yao<sup>a, b, \*</sup>

<sup>a</sup> School of Metallurgical and Energy Engineering, Kunming University of Science and Technology, Kunming 650093, China

<sup>b</sup> State Key Laboratory of Complex Nonferrous Metal Resources Clean Utilization, Kunming 650093, China

<sup>c</sup> Southwest United Grad Sch, Kunming 650091, China

**Corresponding author:**

\*Email addresses: [hujunxian@kust.edu.cn](mailto:hujunxian@kust.edu.cn); [yaochun9796@163.com](mailto:yaochun9796@163.com)

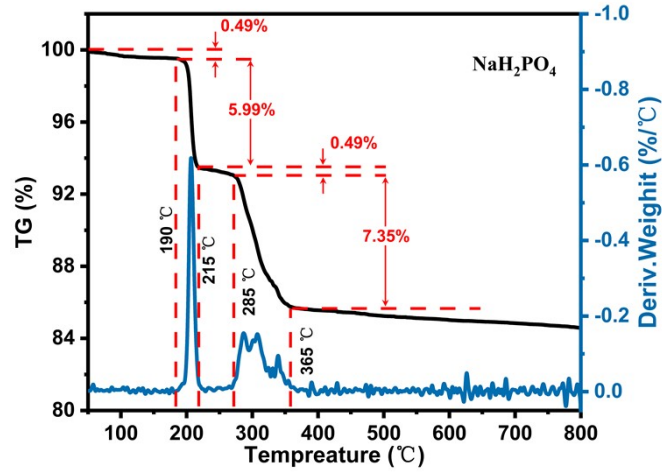

Fig. S1. TGA-Derived Mass Loss Characteristics of  $\text{NaH}_2\text{PO}_4$  During Pyrolysis

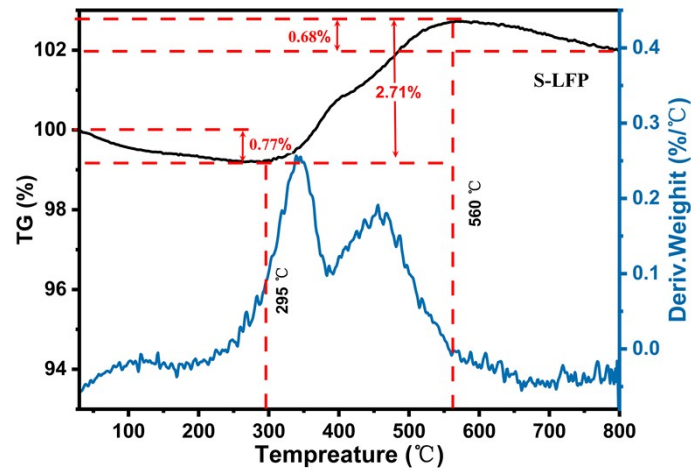

Fig. S2. TGA-Derived Mass Loss Characteristics of S-LFP During Pyrolysis

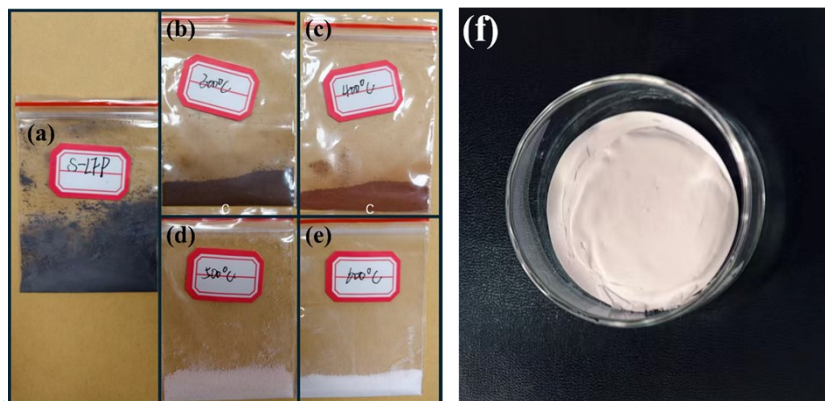

Fig. S3. Digital photographs of (a) spent LFP cathode powder, (b-e) roasted powders at different calcination temperatures, and (f) the dried leaching residue.

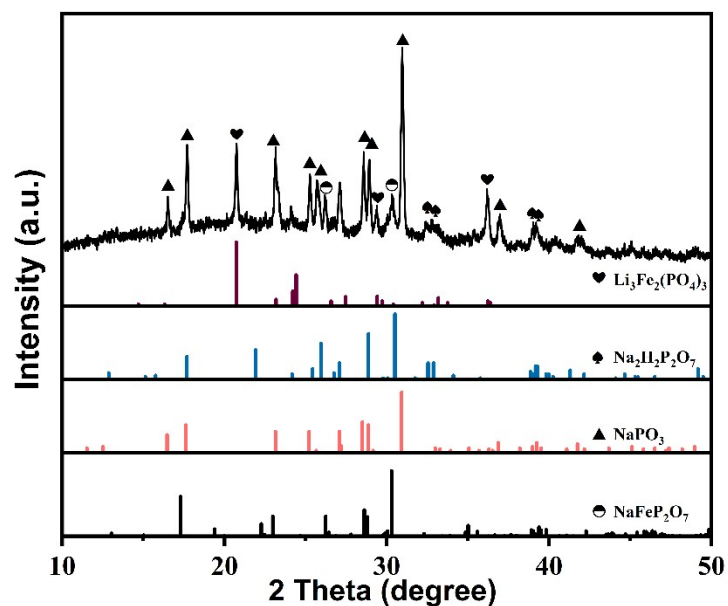

Fig. S4. XRD pattern of the S-LFP/NaH<sub>2</sub>PO<sub>4</sub> mixture roasted at 600 °C for 10 min.

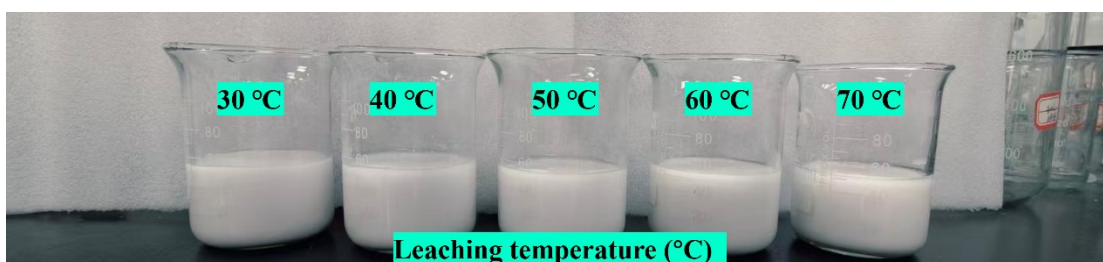

Fig. S5. Digital photographs of leaching slurries under different leaching temperatures (30-70 °C).

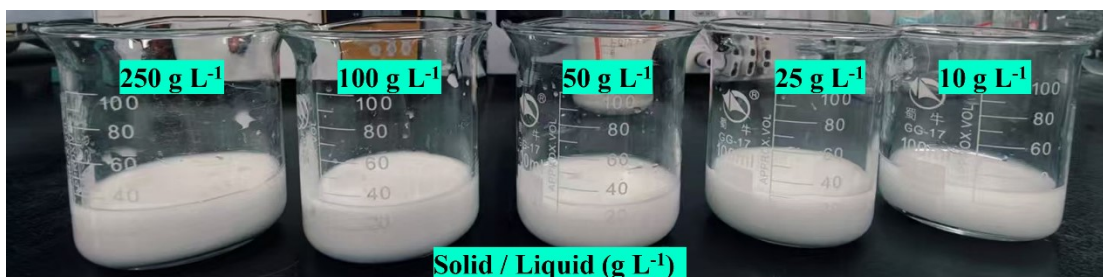

Fig. S6. Digital photographs of leaching slurries under different solid-to-liquid ratios (10-250 g·L<sup>-1</sup>)

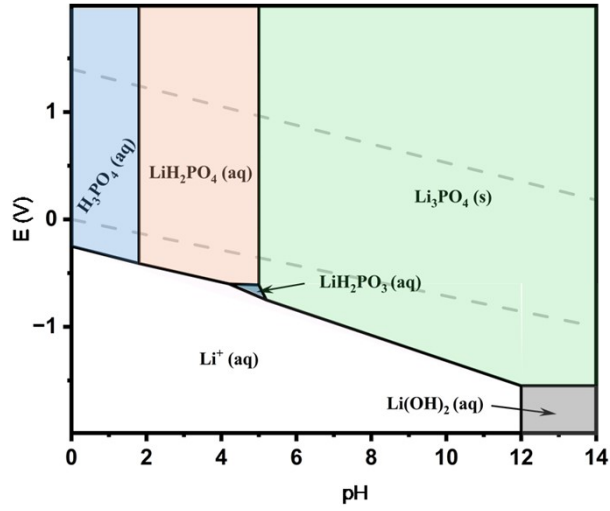

Fig. S7. The E-pH diagram of the Li-Fe-P-H<sub>2</sub>O system at 298.15 K.

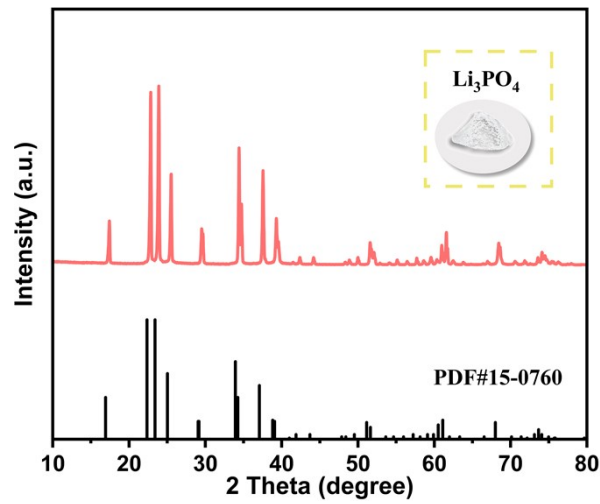

Fig. S8. XRD pattern of Li<sub>3</sub>PO<sub>4</sub>.

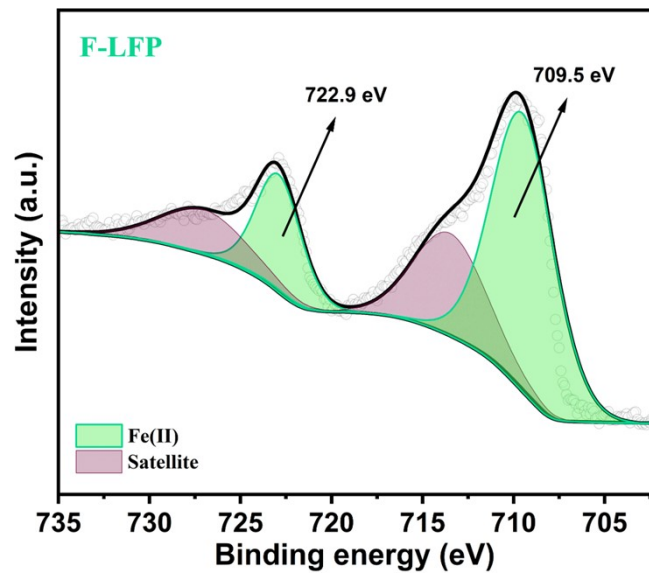

Fig. S9. Fe 2p XPS spectrum of the F-LFP powder.

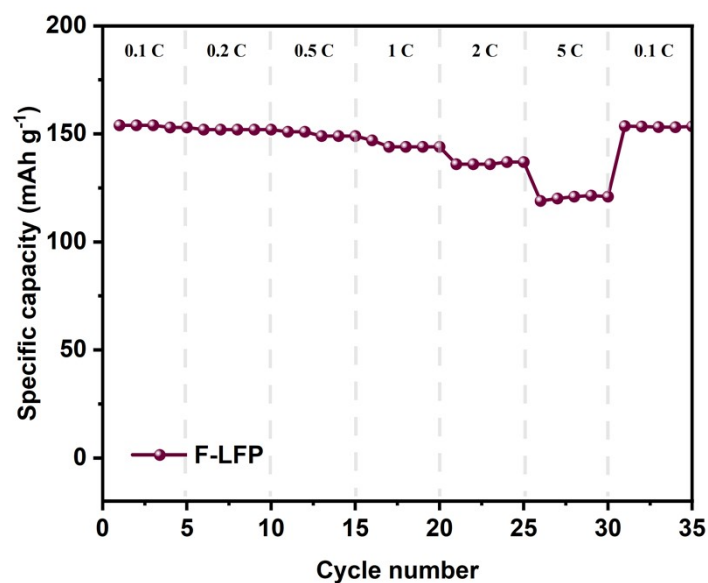

Fig. S10. Rate capability of F-LFP under varying C-rates.

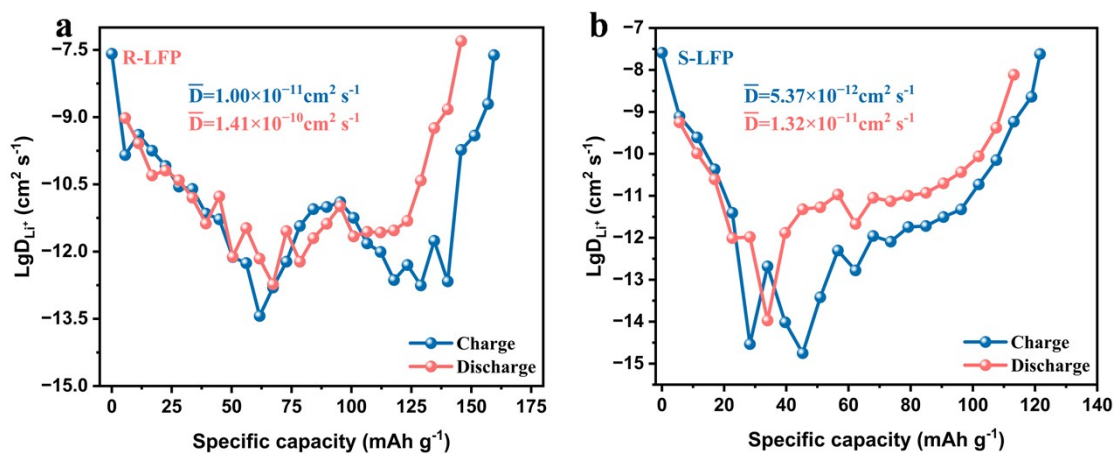

Fig. S11. (a, b) corresponding  $\text{Li}^+$  ion diffusion coefficient of R-LFP and S-LFP electrode.

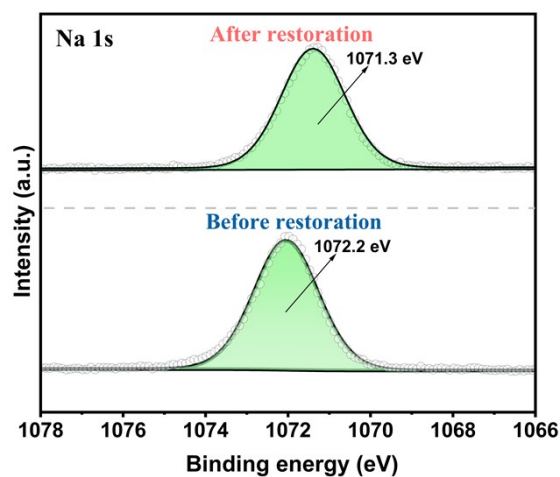

Fig. S12. High-resolution XPS spectra of the Na 1s level before and after reduction.

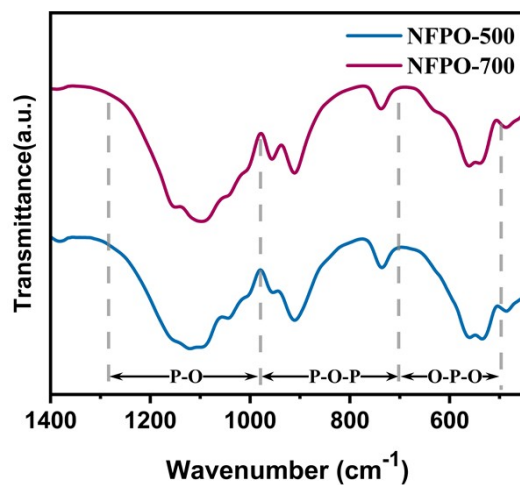

Fig. S13. FTIR spectra of NFP-500, and NFP-700.

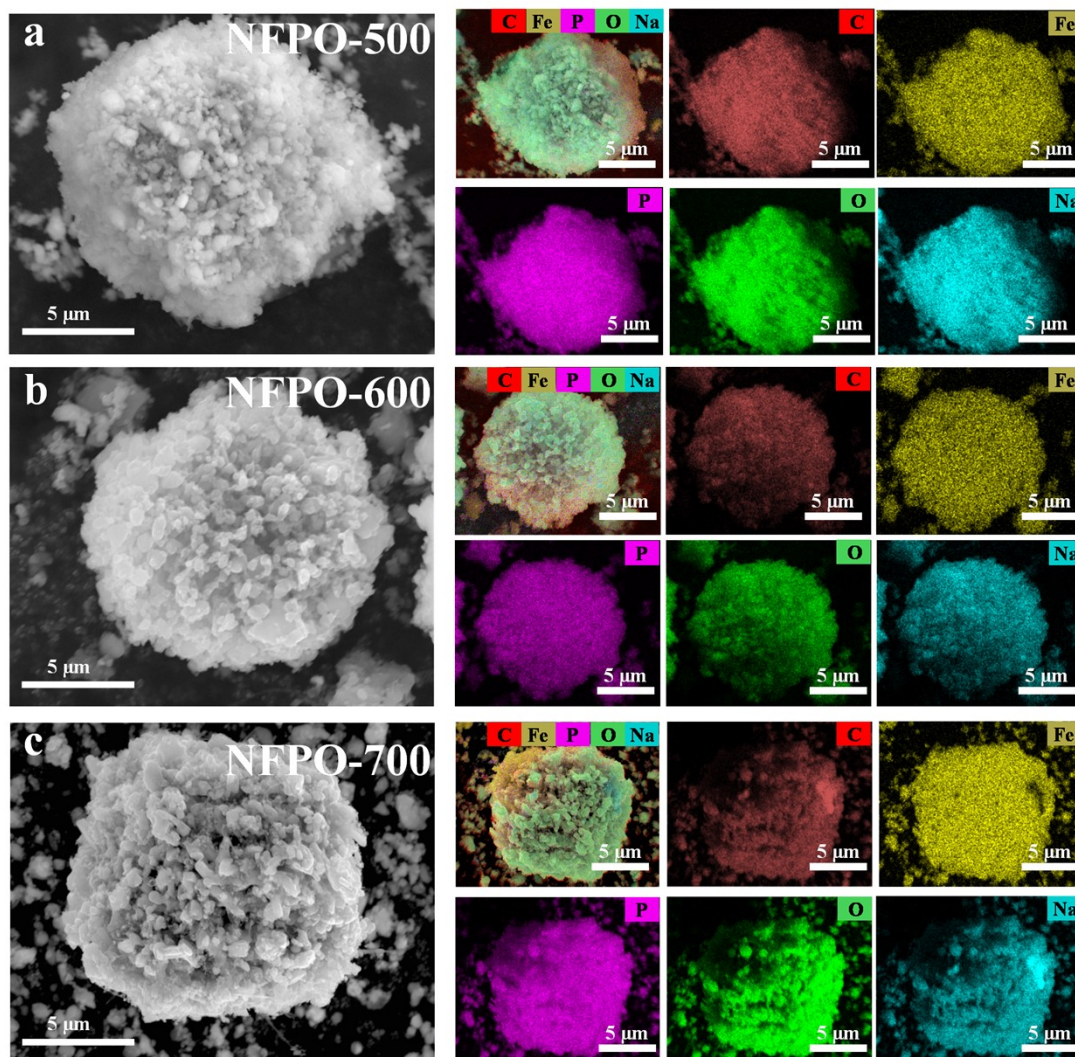

Fig. S14. (a-c) STEM-EDS elemental mapping images of Na, Fe, P, O and C for NFPO-500, NFPO-600 and NFPO-700.

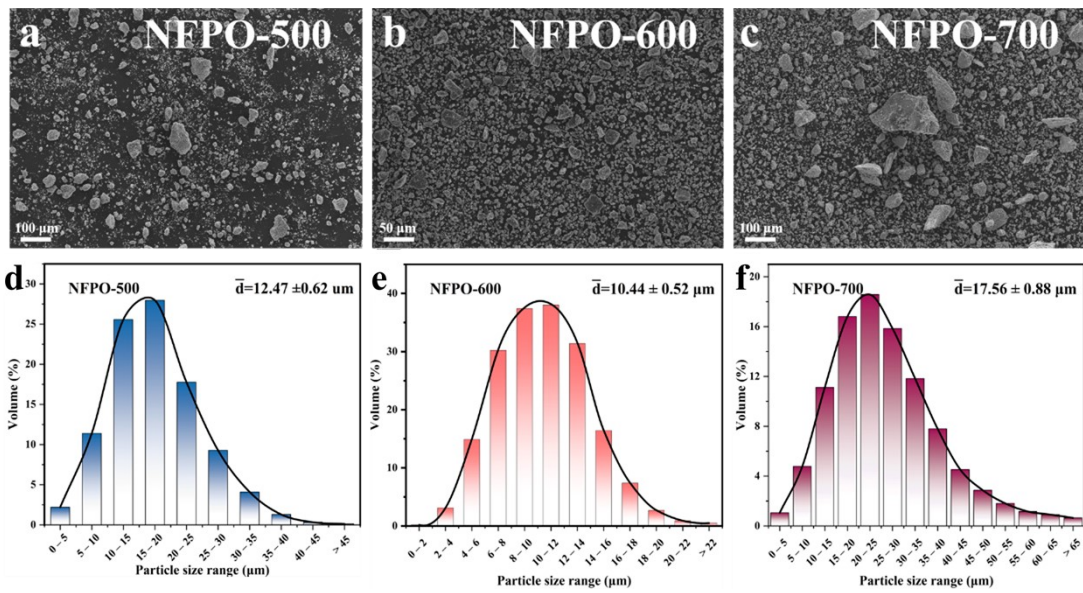

**Fig. S15.** (a-c) High-magnification SEM images and (d-f) particle size distributions of NFPO-500, NFPO-600, and NFPO-700.

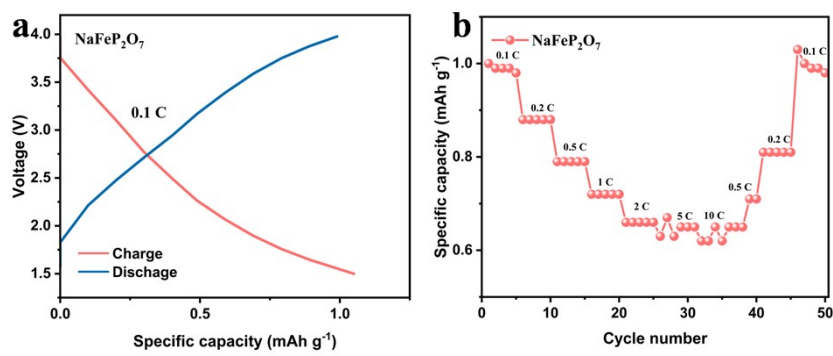

**Fig. S16.** (a) Charge and discharge curves of  $\text{NaFeP}_2\text{O}_7$  at 0.1 C, (B) Rate capability NFPO-HC at different current rates.

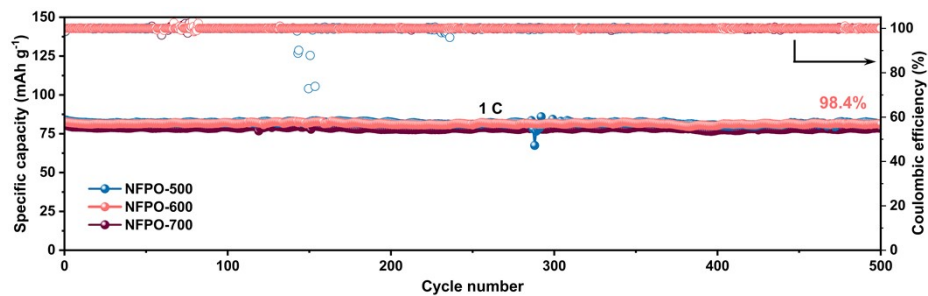

**Fig. S17.** Cycling performance of NFPO-500, NFPO-600, and NFPO-700 at 1 C.

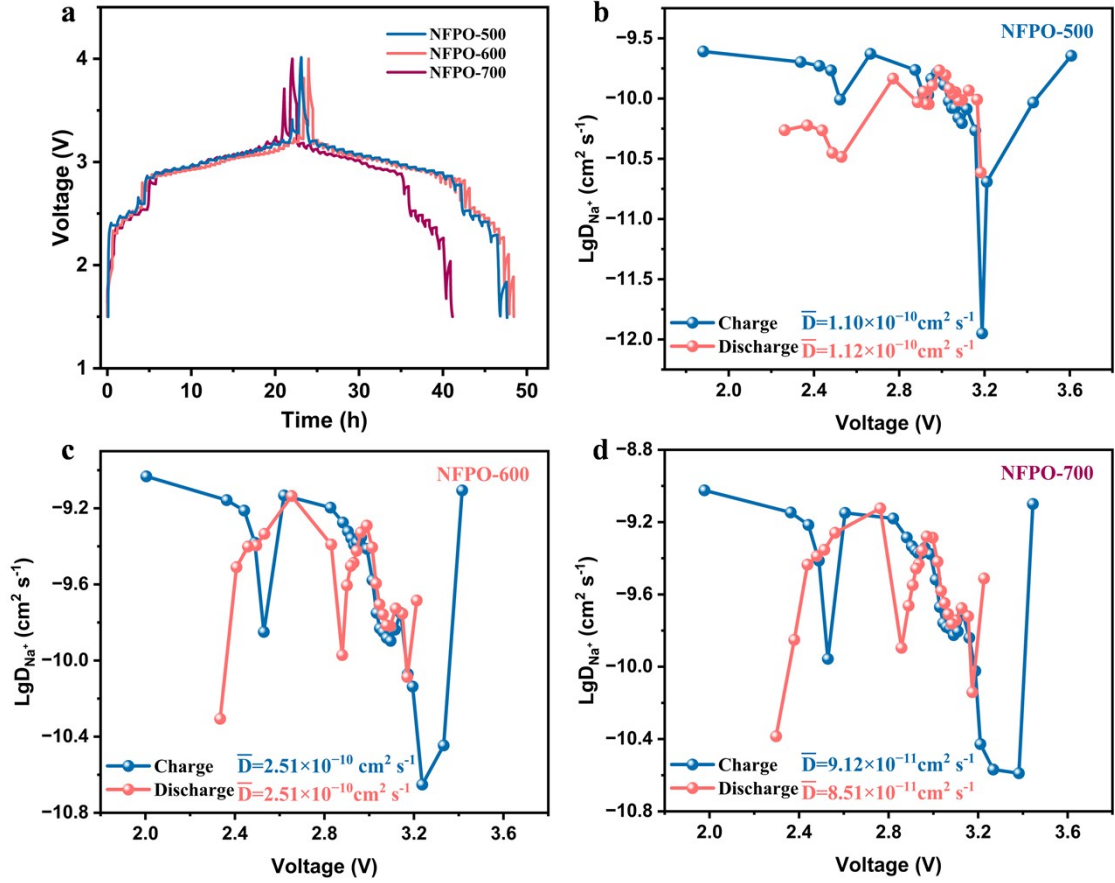

**Fig. S18.** (a) GITT curves of NFPO-500, NFPO-600 and NFPO-700 electrodes. (b, c, d) Corresponding  $\text{Na}^+$  ion diffusion coefficients of NFPO-500, NFPO-600 and NFPO-700 electrodes during charge-discharge processes.

$$D_K = \frac{4}{\pi\tau} \left( \frac{m_B V_M}{M_B S} \right)^2 \left( \frac{\Delta E_s}{\Delta E_L} \right)^2 \left( \tau = \frac{L^2}{D} \right) \quad (\text{Equation S1})$$

Where  $\tau$  refers to constant current pulse time,  $m_B$ ,  $V_M$ ,  $M_B$ , and  $S$  are the mass, molar volume, molar mass, and electrode-electrolyte interface area, respectively.  $\Delta E_s$  is the voltage difference of one pulse-relaxation period, and  $\Delta E_L$  is the voltage difference of one constant current pulse.[1]

Where  $\tau$  is the constant current pulse time,  $m_B$ ,  $M_B$ , and  $S$  are the mass, molar mass, and electrode-electrolyte interface area of the active material, respectively.  $\Delta E_s$  is the steady-state voltage change during the pulse, and  $\Delta E_L$  is the voltage change during the constant current pulse. The key parameter molar volume ( $V_M$ ) is defined as the volume occupied by one mole of a substance and is calculated by:

$$V_M = M_B / \rho \quad (\text{Equation S2})$$

where  $\rho$  is the theoretical density of the material, derived from its crystal structure. The molar volumes for the specific materials discussed were calculated as follows:

For  $\text{LiFePO}_4$  (R-LFP and S-LFP in Fig. S5):

Molar Volume ( $V_M$ ):  $V_M = M_B / \rho = 157.76 \text{ g/mol} / 3.6 \text{ g/cm}^3 = 43.82 \text{ cm}^3/\text{mol}$

For  $\text{Na}_2\text{FeP}_2\text{O}_7$  (NFPO electrodes in Fig. S8):

Molar Volume ( $V_M$ ):  $V_M = M_B/\rho = 274.75 \text{ g/mol} / 3.25 \text{ g/cm}^3 = 84.54 \text{ cm}^3/\text{mol}$

These calculated  $V_M$  values were then used in Equation S1 to determine the  $\text{Li}^+$  and  $\text{Na}^+$  ion diffusion coefficients presented in Figs S5 and S8.

**Table S1.** Elements composition of cathode scrap

| Elements | Fe    | Li   | Al   | P     | C    |
|----------|-------|------|------|-------|------|
| wt%      | 35.47 | 4.07 | 0.16 | 18.29 | 4.38 |

**Table S2.** Enthalpy changes of main reactions obtained by linear fitting of  $\Delta G$ -T curves

| No. | Reaction equation                                                                                                                     | Enthalpy change $\Delta H$ ( $\text{kJ}\cdot\text{mol}^{-1}$ ) |
|-----|---------------------------------------------------------------------------------------------------------------------------------------|----------------------------------------------------------------|
| 1   | $2\text{NaH}_2\text{PO}_4 = \text{Na}_2\text{H}_2\text{P}_2\text{O}_7 + \text{H}_2\text{O}(\text{g})$                                 | 79.98                                                          |
| 2   | $\text{Na}_2\text{H}_2\text{P}_2\text{O}_7 = 2\text{NaPO}_3 + \text{H}_2\text{O}(\text{g})$                                           | 100.11                                                         |
| 3   | $2\text{FePO}_4 + \text{Na}_2\text{H}_2\text{P}_2\text{O}_7 = 2\text{NaFeP}_2\text{O}_7 + \text{H}_2\text{O}(\text{g})$               | 114.63                                                         |
| 4   | $\text{Li}_3\text{PO}_4 + 5\text{Na}_3\text{PO}_4 = 3\text{LiNa}_5(\text{PO}_4)_2$                                                    | -23.79                                                         |
| 5   | $\text{Fe}_2\text{O}_3 + \text{P}_2\text{O}_5(\text{g}) = 2\text{FePO}_4$                                                             | -275.66                                                        |
| 6   | $\text{Li}_3\text{Fe}_2(\text{PO}_4)_3 = \text{Li}_3\text{PO}_4 + \text{Fe}_2\text{O}_3 + \text{P}_2\text{O}_5(\text{g})$             | -253.15                                                        |
| 7   | $3\text{NaPO}_3 = \text{Na}_3\text{PO}_4 + \text{P}_2\text{O}_5(\text{g})$                                                            | -185.66                                                        |
| 8   | $\text{LiFePO}_4 + 1/4\text{O}_2(\text{g}) = 1/3\text{Li}_3\text{Fe}_2(\text{PO}_4)_3 + 1/6\text{Fe}_2\text{O}_3$                     | -54.20                                                         |
| 9   | $\text{Li}_3\text{PO}_4 + 6\text{NaPO}_3 = \text{Li}_2\text{NaPO}_4 + \text{LiNa}_5(\text{PO}_4)_2 + 2\text{P}_2\text{O}_5(\text{g})$ | 109.99                                                         |

**Table S3.** Elements composition of recycled  $\text{Li}_3\text{PO}_4$

| Elements | $\text{Li}_3\text{PO}_4$ | Fe     | Al     | Na     |
|----------|--------------------------|--------|--------|--------|
| wt%      | 99.65%                   | 0.008% | 0.005% | 0.085% |

**Table S4.** Resource inputs required to recycle 1 t of S-LFP batteries via Pyrometallurgy

| Pyr. (Pyrometallurgy) |              |            |           |
|-----------------------|--------------|------------|-----------|
| Consumption           | Price (\$/t) | Dosage (t) | Cost (\$) |
| S-LFP                 | 1376.87      | 1          | 1376.87   |
| Coke                  | 559.66       | 0.18       | 100.74    |
| $\text{CaCO}_3$       | 27.93        | 0.15       | 4.19      |

|                                 |        |                         |        |
|---------------------------------|--------|-------------------------|--------|
| Na <sub>2</sub> CO <sub>3</sub> | 275.37 | 0.0837                  | 23.05  |
| NaOH                            | 384.07 | 2.0538×10 <sup>-4</sup> | 0.10   |
| Water                           | 0.46   | 20                      | 9.20   |
| Electricity                     | 0.11   | 2450                    | 269.50 |
| Wastewater                      | 8.23   | 20                      | 164.60 |
| Maintenance fee                 | /      | 41.4137                 | 230.40 |
| Labor cost                      | /      | /                       | 349.44 |
| Other expenses                  | /      | /                       | 170.41 |
| Total (\$)                      |        | 2698.50                 |        |

Note: 1 \$ = 7.18 ¥ (Update time: 2025/9)

The "Other expenses" item encompasses typical operational overhead inherent to industrial-scale production, primarily comprising energy consumption, costs of precursor materials and chemicals, as well as expenses associated with reagent recycling and processing.

**Table S5.** Resource inputs required to recycle 1 t of S-LFP batteries via Hydrometallurgy

| Hyd. (Hydrometallurgy)          |              |                         |           |
|---------------------------------|--------------|-------------------------|-----------|
| Consumption                     | Price (\$/t) | Dosage (t)              | Cost (\$) |
| S-LFP                           | 1376.87      | 1                       | 1376.87   |
| H <sub>2</sub> SO <sub>4</sub>  | 1080.25      | 0.089                   | 96.14     |
| H <sub>2</sub> O <sub>2</sub>   | 115.94       | 0.112                   | 12.99     |
| Na <sub>3</sub> PO <sub>4</sub> | 907.82       | 0.268                   | 243.30    |
| NaOH                            | 384.07       | 5.1345×10 <sup>-4</sup> | 0.20      |
| Water                           | 0.46         | 50                      | 230.00    |
| Electricity                     | 0.11         | 300                     | 33.00     |
| Wastewater                      | 18.23        | 50                      | 911.50    |
| Maintenance fee                 | /            | /                       | 767.60    |
| Labor cost                      | /            | /                       | 363.12    |
| Other expenses                  | /            | /                       | 170.41    |
| Total (\$)                      |              | 4205.13                 |           |

Note: 1 \$ = 7.12 ¥ (Update time: 2025/9)

The "Other expenses" item encompasses typical operational overhead inherent to industrial-scale production, primarily comprising energy consumption, costs of precursor materials and chemicals, as well as expenses associated with reagent recycling and processing.

**Table S6.** Resource inputs required to recycle 1 t of S-LFP batteries via Auxiliary roasting

| Auxiliary roasting (AR)          |              |                         |           |
|----------------------------------|--------------|-------------------------|-----------|
| Consumption                      | Price (\$/t) | Dosage (t)              | Cost (\$) |
| S-LFP                            | 1376.87      | 1                       | 1376.87   |
| NaH <sub>2</sub> PO <sub>4</sub> | 677.37       | 2.5                     | 1693.43   |
| FePO <sub>4</sub>                | 642.45       | 0.925                   | 594.27    |
| CH <sub>3</sub> COONa            | 345.02       | 0.520                   | 179.41    |
| Sucrose                          | 812.85       | 0.338                   | 274.743   |
| Na <sub>3</sub> PO <sub>4</sub>  | 302.61       | 0.268                   | 80.80     |
| NaOH                             | 384.07       | 3.0538×10 <sup>-4</sup> | 0.11      |

|                 |      |         |        |
|-----------------|------|---------|--------|
| Water           | 0.36 | 30      | 10.80  |
| Electricity     | 0.11 | 500     | 55.00  |
| Wastewater      | 8.23 | 3       | 24.69  |
| Maintenance fee | /    | 535.682 | 52.30  |
| Labor cost      | /    | /       | 432.45 |
| Other expenses  | /    | /       | 170.41 |
| Total (\$)      |      | 4945.28 |        |

Note: 1 \$ = 7.12 ¥ (Update time: 2025/9)

The "Other expenses" item encompasses typical operational overhead inherent to industrial-scale production, primarily comprising energy consumption, costs of precursor materials and chemicals, as well as expenses associated with reagent recycling and processing.

**Table S7.** Economic Benefits of Recycling 1 t of S-LFP Batteries via Pyrometallurgy Process

| Pyr. (Pyrometallurgy)           |              |            |              |
|---------------------------------|--------------|------------|--------------|
| Product                         | Price (\$/t) | Dosage (t) | Revenue (\$) |
| Li <sub>2</sub> CO <sub>3</sub> | 13268.16     | 0.17       | 2255.59      |
| Phosphorus iron slag            | 167.59       | 0.48       | 80.44        |
| Total (\$)                      |              | 2336.03    |              |
| Profit                          |              | -362.47    |              |

Note: 1 \$ = 7.12 ¥ (Update time: 2025/9)

**Table S8.** Economic Benefits of Recycling 1 t of S-LFP Batteries via Hydrometallurgical Process

| Hyd. (Hydrometallurgy)          |              |            |              |
|---------------------------------|--------------|------------|--------------|
| Product                         | Price (\$/t) | Dosage (t) | Revenue (\$) |
| Li <sub>3</sub> PO <sub>4</sub> | 33334.78     | 0.13       | 4333.52      |
| FePO <sub>4</sub>               | 1942.11      | 0.956      | 1864.43      |
| Total (\$)                      |              | 6197.95    |              |
| Profit                          |              | 1,992.82   |              |

Note: 1 \$ = 7.12 ¥ (Update time: 2025/9)

**Table S9.** Economic Benefits of Recycling 1 t of S-LFP Batteries via Auxiliary roasting Process

| Auxiliary roasting (AR) |              |            |              |
|-------------------------|--------------|------------|--------------|
| Product                 | Price (\$/t) | Dosage (t) | Revenue (\$) |
| R-LFP                   | 2935.113     | 0.967      | 2847.06      |
| NFPO                    | 3522.134     | 1.413      | 4966.20      |
| Total (\$)              |              | 7813.26    |              |
| Profit                  |              | 2867.98    |              |

Note: 1 \$ = 7.12 ¥ (Update time: 2025/9)

**Table S10.** Calculation of the E-factor for the assisted roasting (AR) process based on treating 1 kg of S-LFP scrap

| Parameter   | Value / Description                                                                                                 |
|-------------|---------------------------------------------------------------------------------------------------------------------|
| Total input | 1 kg S-LFP + 2.5 kg NaH <sub>2</sub> PO <sub>4</sub> + 0.925 kg FePO <sub>4</sub> + 0.52 kg CH <sub>3</sub> COONa + |

|                        |                                                                                                                                                          |
|------------------------|----------------------------------------------------------------------------------------------------------------------------------------------------------|
| materials              | 0.338 kg sucrose = 5.283 kg                                                                                                                              |
| Target product mass    | 0.967 kg R-LFP + 1.413 kg NFPO = 2.38 kg                                                                                                                 |
| Waste mass (estimated) | Mainly washing water and roasting off-gas, actual discharged waste $\approx$ 0.5 kg                                                                      |
| E-factor               | Waste mass / Product mass = 0.5 / 2.38 $\approx$ 0.21                                                                                                    |
| Significance           | Far lower than conventional hydrometallurgy (E-factor > 20) and pyrometallurgy (E-factor > 10), indicating high atom economy and minimal waste emission. |

Note: E-factor is defined as the ratio of total waste mass to target product mass, serving as a measure of the “cleanness” of a process.

**Table S11.** P/Na closed-loop mass balance for the treatment of 1 tonne of S-LFP scrap

| Stream                                                                                     | P mass (kg)         | Na mass (kg)         | Remarks and data source                                                                                      |
|--------------------------------------------------------------------------------------------|---------------------|----------------------|--------------------------------------------------------------------------------------------------------------|
| S-LFP scrap                                                                                | 182.9               | 0                    | Table S2: P 18.29 wt%                                                                                        |
| Fresh NaH <sub>2</sub> PO <sub>4</sub> (first use)                                         | 645.0               | 479.0                | Table S5: 2.5 t, P 25.8%, Na 19.16%                                                                          |
| Entering NFPO product                                                                      | 317.4               | 235.7                | Table S8: 1.413 t, P 22.46%, Na 16.68%                                                                       |
| Entering R-LFP product                                                                     | 0                   | 0                    | Uses purchased FePO <sub>4</sub> ; no P/Na consumed from the system                                          |
| Loss in wastewater                                                                         | 8.3                 | 20.0                 | based on consideration of solution residue and washing efficiency                                            |
| Recovered by off-gas absorption system (for NaH <sub>2</sub> PO <sub>4</sub> regeneration) | 502.2               | 223.3                | Residual amount (479.0 – 235.7 – 20.0 = 223.3)                                                               |
| Net make-up after circulation                                                              | 0                   | 149.3                | Requires NaOH addition to achieve a Na/P molar ratio of 1:1 (required for NaH <sub>2</sub> PO <sub>4</sub> ) |
| Closed-loop efficiency                                                                     | P recovery<br>99.0% | Na recovery<br>95.8% | (Input – Loss) / Input; Na input = 479.0 kg                                                                  |

**Note:** The net Na make-up is calculated as follows: in the recovered stream, Na = 223.3 kg, P = 502.2 kg, giving a Na/P molar ratio of  $(223.3/23) / (502.2/31) = 9.71 / 16.20 = 0.60$ . To adjust this ratio to 1:1, the required additional amount of Na is  $16.20 - 9.71 = 6.49$  kmol, corresponding to a Na mass of  $6.49 \times 23 = 149.3$  kg.

**Table S12.** Comparison of greenhouse gas emissions for different recycling processes treating 1 tonne of S-LFP scrap

| Process               | Relative GHG emission level | Main sources                                          |
|-----------------------|-----------------------------|-------------------------------------------------------|
| Pyrometallurgy (Pyro) | Very high                   | High-temperature roasting (>1200 °C), coke combustion |
| Hydrometallurgy       | High                        | Acid/alkali production, energy consumption for        |

---

|                                                                       |     |                                                                                             |
|-----------------------------------------------------------------------|-----|---------------------------------------------------------------------------------------------|
| (Hydro)                                                               |     | wastewater treatment                                                                        |
| K <sub>2</sub> S <sub>2</sub> O <sub>7</sub> -based full regeneration | Low | Roasting at 600 °C, but K <sub>2</sub> S <sub>2</sub> O <sub>7</sub> cannot be recycled [2] |
| This work (AR)                                                        | Low | Roasting at 600 °C + carbothermal reduction at 700 °C, partial reagent closure              |

---

## References

- [1] Y.-J.Wang, Z.-Y.Gu, D.-S.Bai, Z.-L.Hao, H.-W.Huang, Y.Yan, C.-J.Li, A.-M.Liu, X.-L.Wu, *Angew. Chem. Int. Ed.* 2025, e202507573.
- [2] H. Hu, X. Meng, Y. Li, Y. Yang, Y. Xu, J. Hu, Y. Yao, *ACS Sustainable Chem. Eng.* 12 (2024) 16553-16563.
